# Supplementary material
Source: MDPI journal article supplement (https://www.mdpi.com/2073-4433/13/8/1212)
Supplement: s1 [file s1]

Archive with 4 entries (4 files):
- Supplementary figures and tables.pptx
- Supplementary information.pdf
- Table S1.xlsx
- Table S2.xlsx
