# Supplementary material
Source: MDPI journal article supplement (https://www.mdpi.com/2073-4433/13/8/1212)
Supplement: s1 [file s1 › Table S1.xlsx]

## Sheet: Sheet1
Table S1. Average value of each of the environmental parameter during sample collection
Sample ID	Temperature (deg C)	Pressure (mbar)	Humidity (%)	wind_Sp (m/s)	Total Precipitation Rate (mm/hour)	Cn (P/cm3)	PM1 (ug/m3)	PM2.5 (ug/m3)	PM10 (ug/m3)	PMtotal (ug/m3)	CH4 (ppb)	CO2 (ppm)	CO (ppb)	NH3 (ppb)	Al 13 (ng/m3)	Si 14 (ng/m3)	P 15 (ng/m3)	S 16 (ng/m3)	Cl 17 (ng/m3)	K 19 (ng/m3)	Ca 20 (ng/m3)	Ti 22 (ng/m3)	V 23 (ng/m3)	Cr 24 (ng/m3)	Mn 25 (ng/m3)	Fe 26 (ng/m3)	Co 27 (ng/m3)	Ni 28 (ng/m3)	Cu 29 (ng/m3)	Zn 30 (ng/m3)	Ga 31 (ng/m3)	Ge 32 (ng/m3)	As 33 (ng/m3)	Se 34 (ng/m3)	Br 35 (ng/m3)	Sr 38 (ng/m3)	Y 39 (ng/m3)	Zr 40 (ng/m3)	Nb 41(ng/m3)	Mo 42 (ng/m3)	Pd 46 (ng/m3)	Ag 47 (ng/m3)	Cd 48 (ng/m3)	In 49 (ng/m3)	Sn 50 (ng/m3)	Sb 51 (ng/m3)	Te 52 (ng/m3)	Ba 56 (ng/m3)	La 57 (ng/m3)
FIRS1_7	5.64161	993.105	89.421	0.956083	0.0278986	99.2845	3.18972	4.11451	6.31333	7.8475	2.0719	447.944	262.078	1.42679	97.3432	18.7184	0.0521261	151.596	397.001	55.0236	128.137	3.61003	0.0853783	1.24566	1.26673	268.141	0	0.0823783	6.89691	8.77958	0	0.00273043	1.8649	0.383813	1.92691	0.222974	0.0909043	0.0775652	445.438	0.00171304	16.1324	1.03755	1.04894	0.45443	0.2242	0.440809	2.3041	3.08603	0
FIRS1_8	5.65693	989.966	82.5201	2.27674	0.00260417	188.609	6.04931	7.42931	10.4142	12.787	1.96471	423.887	187.805	2.2514	80.5694	61.4123	0	426.733	808.066	73.9036	149.738	6.24277	0.104229	1.58323	2.85792	221.891	0	0.273196	5.27598	14.5898	0	0	1.90141	0.453029	4.73668	0.265133	0.067425	0.102508	445.274	0.0068375	17.135	1.18229	0.758175	0.475046	1.09159	0.386075	2.38484	1.95689	0
FIRS1_9	6.18927	1001.16	85.9964	1.66636	0.244361	49.1483	1.69381	2.5673	4.57738	6.17357	1.93648	421.009	143.684	1.54244	22.5039	99.1525	0	133.467	591.562	43.0088	98.2488	5.52502	0.0442381	0.153548	1.89887	124.353	0	0.0426667	2.44341	6.22472	0	9.52381e-06	0.466071	0.000795238	1.68083	0.111476	0.164986	0.0430571	445.846	0.0230762	18.1456	0.483957	0.588214	0.684924	0.80129	0.2395	3.69326	0.945481	0
FIRS1_12	7.7687	1002.05	84.8941	1.27554	0.00532103	95.8102	3.52701	5.19278	8.28618	10.4311	1.98708	425.21	150.973	1.66409	71.19	37.4844	0	323.855	1164.98	89.3777	141.43	4.10401	0.0532208	0.322108	0.972208	161.682	0	0.00900417	4.51978	8.43805	0.00399583	0	0.846133	0.0211667	4.32406	1.76995	0.192367	0.365292	445.172	0.0424958	16.9112	0.882692	0.411825	0.670875	0.828229	0.306233	3.19834	3.58867	0.0196417
FIRS1_13	7.73786	1002.53	95.5833	0.489719	0.0981498	392.137	12.8964	14.0678	16.2919	17.9389	2.25177	467.127	321.579	2.77697	138.64	31.3186	0	569.555	331.491	243.699	147.029	5.91092	0.111838	1.82942	2.73823	506.045	0	0.0470417	16.2251	37.6375	0	0	4.6687	0.0187458	10.9063	3.34003	0.0552333	0.491458	445.888	0.0592042	15.7128	1.03615	0.640979	0.614246	0.318754	0.427171	1.55192	12.7001	0
FIRS1_14	5.3904	1010.86	92.362	0.745109	0.0450709	177.527	5.41569	6.24715	7.95458	9.16264	2.10855	453.14	253.895	2.5881	100.355	21.4846	0	283.93	239.641	52.1758	70.9341	2.95748	0	0.829404	1.23969	287.648	0	0.0163583	9.16978	9.79665	0	0.00184583	1.68191	0.0111458	4.9479	0.0881125	0.124113	0.35305	445.377	0.0275667	16.7702	1.27091	0.515771	0.563725	1.98253	0.619825	2.4017	4.06831	0
FIRS2_2	6.39079	1009.31	80.6961	2.72651	0.238446	40.8984	3.41486	7.21132	13.3842	16.6974	1.93778	424.524	177.363	1.94433	341.741	16.1935	0	292.706	4724.25	103.468	284.072	3.2187	0.0603917	0.789179	0.133992	102.402	0.333192	0.0257625	1.36018	2.97361	0	0	0.0857125	0.258738	9.52421	1.75109	0.164942	0.0085125	440.582	0.0113	14.1348	1.1794	1.5064	0.473608	0.286946	0.812983	2.28282	0.685075	0.002125
FIRS2_3	9.26506	1004.24	80.694	3.57884	0.340461	22.8825	1.68562	3.23	5.45771	6.63264	1.91433	418.877	147.631	2.07932	366.574	0.944183	0	124.609	2092.36	46.7316	91.8101	1.11129	0.0109125	0.0189625	0.0378125	46.6853	0	0	0.411104	1.64888	0	0.000329167	0.127875	0.0607125	4.97467	0.456371	0.186887	0	440.63	0.0187667	13.9853	0.496429	0.199562	0.642962	0.435992	0.697937	1.3059	0.200104	0.0360292
FIRS2_4	6.56712	1006.74	86.7221	2.34222	0.711712	37.8236	2.06972	3.49542	5.62861	6.63951	1.95151	424.277	159.904	1.54575	281.174	3.3675	0.0262167	140.157	1739.61	51.4981	69.1649	1.21879	0.0403375	0.0774	0.00630417	52.7693	0	0	0.544496	3.93497	0	7.08333e-05	0.377704	0.354362	3.90815	0.482717	0.171833	0.0336875	441.15	0.114721	14.4452	1.35826	0.623421	0.495629	0.796229	0.431792	2.52092	0.284842	0.0307583
FIRS2_5	6.87203	1004.48	85.7209	1.84471	0.467475	57.409	2.70431	4.54986	8.32979	10.8653	1.96173	427.24	191.661	1.49167	219.599	9.95514	0	172.966	2133.36	67.8618	138.962	3.4271	0.0227792	0.220046	0.284546	116.647	0	0.00749583	2.43838	4.68606	0	0	0.516517	0.21265	5.14851	0.700604	0.133592	0.0877583	440.281	0.024875	13.4659	0.771312	0.891375	0.605354	0.425812	0.542625	0.596021	0.624083	0
FIRS2_6	5.23972	993.212	82.8026	2.50542	0.0164905	31.5193	1.81153	3.76333	7.38799	9.26132	1.93757	423.929	185.094	1.18869	180.302	9.46644	0	194.038	2474.56	57.3545	124.288	3.14975	0.110729	0.290879	0.148321	86.5878	0	0.0340792	1.13411	3.23203	0	0	0.138133	0.227979	5.41855	0.795667	0.186554	0.0661667	440.865	0.1178	14.5519	1.28866	0.453675	1.01612	0.913096	0.526708	1.4619	0.332162	0
FIRS2_7	3.6647	992.901	87.1009	2.06219	0.423673	40.5125	2.16667	4.20812	7.89035	9.7875	1.93978	427.272	183.564	1.0398	302.709	2.8727	0.164879	183.276	2504.94	55.341	108.428	2.32252	0.0210875	0.481954	0.164708	85.163	0	0.0608583	1.52438	3.36997	0.000333333	0	0.281642	0.00285833	5.66306	0.638912	0.181629	0	440.657	0.00883333	14.2009	0.864454	0.982033	0.863567	0.508125	0	1.77978	0.406546	0.00230833
FIRS2_8	3.57035	996.005	82.6825	1.76081	0.182417	87.5052	3.635	5.60451	9.535	11.9552	1.99309	431.687	177.247	1.25429	288.804	19.1125	0	240.701	2276.1	76.2029	169.896	3.39192	0.059825	0.408754	0.445908	132.345	0.00727917	0.0068875	2.3627	7.69287	0	0	0.694171	0.0381958	5.56385	0.706825	0.150658	0.0333208	440.033	0.0624042	15.6094	1.2593	0.805571	1.15255	0.723871	0.102379	1.68231	1.00488	0
[truncated: 6 more columns]
