# Supplementary material
Source: MDPI journal article supplement (https://www.mdpi.com/2073-4433/13/8/1212)
Supplement: s1 [file s1 › Table S2.xlsx]

## Sheet: t_test_env_mike_result
Table S2. t-test (or Wilcoxon rank sum test) results of environmental parameters (except wind direction) compared between the two sampling periods.
Environmental parameters	p-value	Average in November, 2019 sampling period	Average in Feburary, 2020 sampling period
Temperature (deg C)	0.625316	6.39746	5.93854
Pressure (mbar)	0.797433	999.946	1000.98
Humidity (%)	0.0525917	88.4628	83.7742
wind_Sp (m/s)	0.00724472	1.23493	2.40296
Total Precipitation Rate (mm/hour)	0.034965	0.0705676	0.340096
Cn (P/cm3)	0.0588558	167.086	45.5072
PM1 (ug/m3)	0.128089	5.46199	2.49824
PM2.5 (ug/m3)	0.285477	6.60314	4.58037
PM10 (ug/m3)	0.702137	8.97293	8.23052
PMtotal (ug/m3)	0.832053	10.7235	10.2627
CH4 (ppb)	0.0789754	2.05341	1.94797
CO2 (ppm)	0.125998	439.72	425.401
CO (ppb)	0.178762	220.002	174.638
NH3 (ppb)	0.0713092	2.04163	1.50626
Al 13 (ng/m3)	4.35065e-05	85.1003	282.986
Si 14 (ng/m3)	0.0335817	44.9285	8.84457
P 15 (ng/m3)	0.699188	0.00868768	0.0272994
S 16 (ng/m3)	0.136843	314.856	192.636
Cl 17 (ng/m3)	0.0011655	588.79	2563.6
K 19 (ng/m3)	0.945221	92.8648	65.494
Ca 20 (ng/m3)	0.571463	122.586	140.946
Ti 22 (ng/m3)	0.013986	4.72504	2.54858
V 23 (ng/m3)	0.367474	0.066484	0.0465804
Cr 24 (ng/m3)	0.0616067	0.993894	0.326739
Mn 25 (ng/m3)	0.00374254	1.82894	0.174513
Fe 26 (ng/m3)	0.0248225	261.627	88.9427
Co 27 (ng/m3)	0.21159	0	0.0486387
Ni 28 (ng/m3)	0.0737482	0.0784408	0.0192976
Cu 29 (ng/m3)	0.028598	7.42183	1.39648
Zn 30 (ng/m3)	0.002331	14.2444	3.93406
Ga 31 (ng/m3)	0.909583	0.000665972	4.7619e-05
Ge 32 (ng/m3)	0.41541	0.000764299	5.71429e-05
As 33 (ng/m3)	0.0459038	1.90485	0.317393
Se 34 (ng/m3)	0.628205	0.148116	0.165071
Br 35 (ng/m3)	0.137529	4.75378	5.743
Sr 38 (ng/m3)	0.365967	0.966279	0.790312
Y 39 (ng/m3)	0.0679246	0.115838	0.168014
Zr 40 (ng/m3)	0.0427792	0.238822	0.032778
Nb 41(ng/m3)	2.96844e-11	445.499	440.6
Mo 42 (ng/m3)	0.274986	0.0268156	0.0512429
Pd 46 (ng/m3)	0.000103682	16.8012	14.3419
Ag 47 (ng/m3)	0.777998	0.982258	1.03112
Cd 48 (ng/m3)	0.544113	0.660651	0.780292
In 49 (ng/m3)	0.147695	0.577208	0.74997
Sn 50 (ng/m3)	0.328303	0.874431	0.584296
Sb 51 (ng/m3)	0.757773	0.403269	0.444918
Te 52 (ng/m3)	0.0346057	2.58902	1.66138
Ba 56 (ng/m3)	0.002331	4.39092	0.505385
La 57 (ng/m3)	0.192555	0.00327361	0.0101744
Ce 58 (ng/m3)	0.730769	0.0171257	0.0157661
Pt 78 (ng/m3)	1	0.000774306	0.00145833
Hg 80 (ng/m3)	0.332819	0.00226537	0.00451964
Tl 81 (ng/m3)	0.930479	0.000647222	0.000567857
Pb 82 (ng/m3)	0.00813307	5.11188	0.234816
Bi 83 (ng/m3)	0.0227418	0.270408	0.0011625
